# Supplementary material
Source: publisher figshare collection journal article supplement (https://acs.figshare.com/ndownloader/files/21962730)
Supplement: Supplementary file 1 [file 21962730]

**Table S1:** Dependence of the amount of adsorbed surfactant within the porous particles on bulk surfactant concentration. Amount of surfactant adsorbed per mg (second column) when 5 $\mu$ m porous particles with 6nm in pore size are added to the surfactant solution of different concentrations. Concentration of the surfactant left in the solution  $C_{\text{residual}}$  is in the last column. The adsorption is given in various units.

| $C_{\text{azo}}/\text{mM}$ | $C_{\text{azo}} (\mu\text{mol}/\text{mg})$ | Molecule/ $\text{nm}^2$ * | (Molecule/Particle)** | $C_{\text{residual}}/\text{mM}$ |
|----------------------------|--------------------------------------------|---------------------------|-----------------------|---------------------------------|
| 0.5                        | 0.06                                       | 0.04                      | $0.5 \cdot 10^{10}$   | 0.29                            |
| 1                          | 0.21                                       | 0.14                      | $1.5 \cdot 10^{10}$   | 0.3                             |
| 2                          | 0.35                                       | 0.25                      | $2.5 \cdot 10^{10}$   | 0.8                             |

\* Adsorbed density of the surfactant in units of molecules per  $\text{nm}^2$

\*\* Number of surfactant molecules absorbed by one particle
